# Supplementary material
Source: MDPI journal article supplement (https://www.mdpi.com/2076-3417/12/14/7020)
Supplement: s1 [file s1]

# Biodeterioration Assessment of a unique old Pharaonic Kingdom Wooden Statue using Advanced Diagnostic Techniques

Dina M. Atwa<sup>1</sup>, Shima Ibrahim<sup>2</sup>, Chiaramaria Stani<sup>3</sup>, Giovanni Birarda<sup>4</sup>, Nehal Ali<sup>5</sup>, Emam Abdullah<sup>6</sup>, Lisa Vaccari<sup>4</sup>, Paola Grenni<sup>7,\*</sup>, Andrea Visca<sup>7</sup>, Yehia Badr<sup>8</sup>, Wafaa Soliman<sup>8</sup>

## Supplementary materials

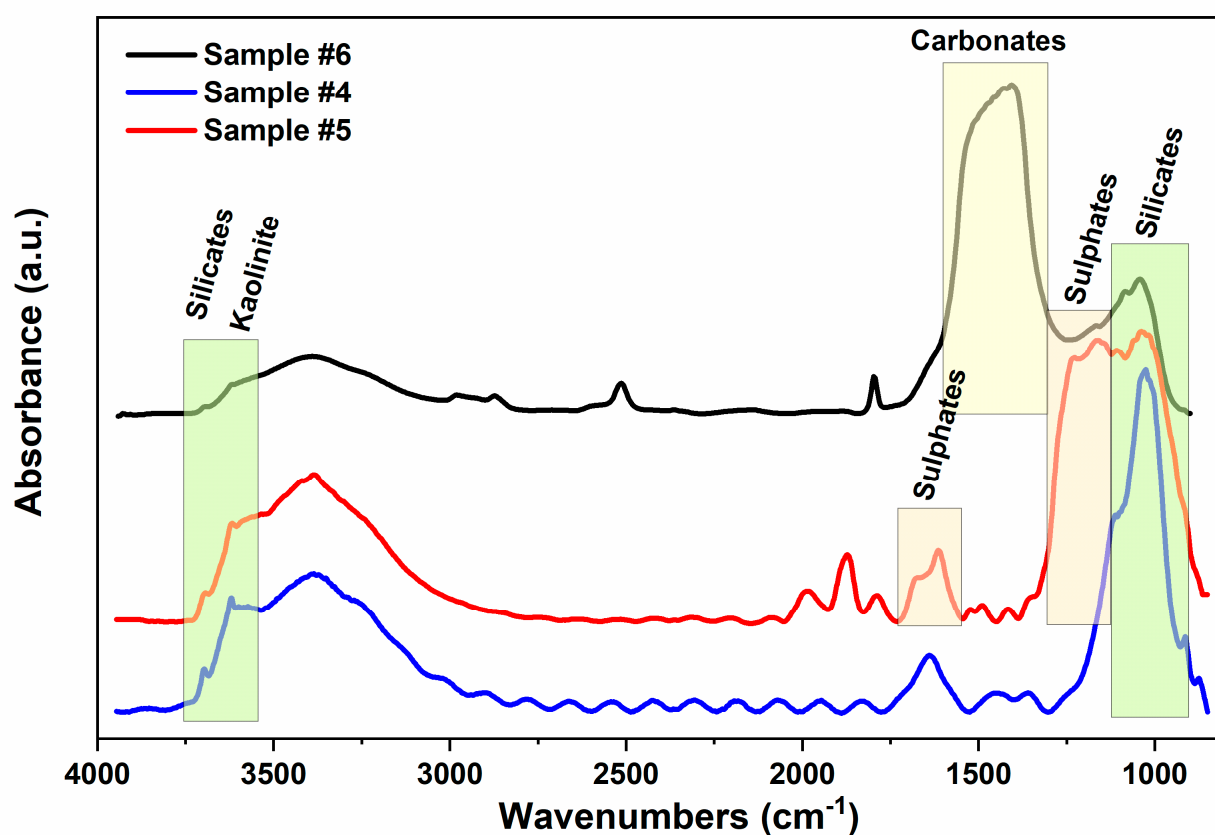

**Figure S1.** Infrared spectra of the soil samples #4, #5 and #6. The coloured selections highlight the characteristic infrared features of carbonates, sulphates and silicate. Among silicates, the presence of kaolinite can be distinguished by the sharp absorptions in the 3750-3500 cm<sup>-1</sup> range.

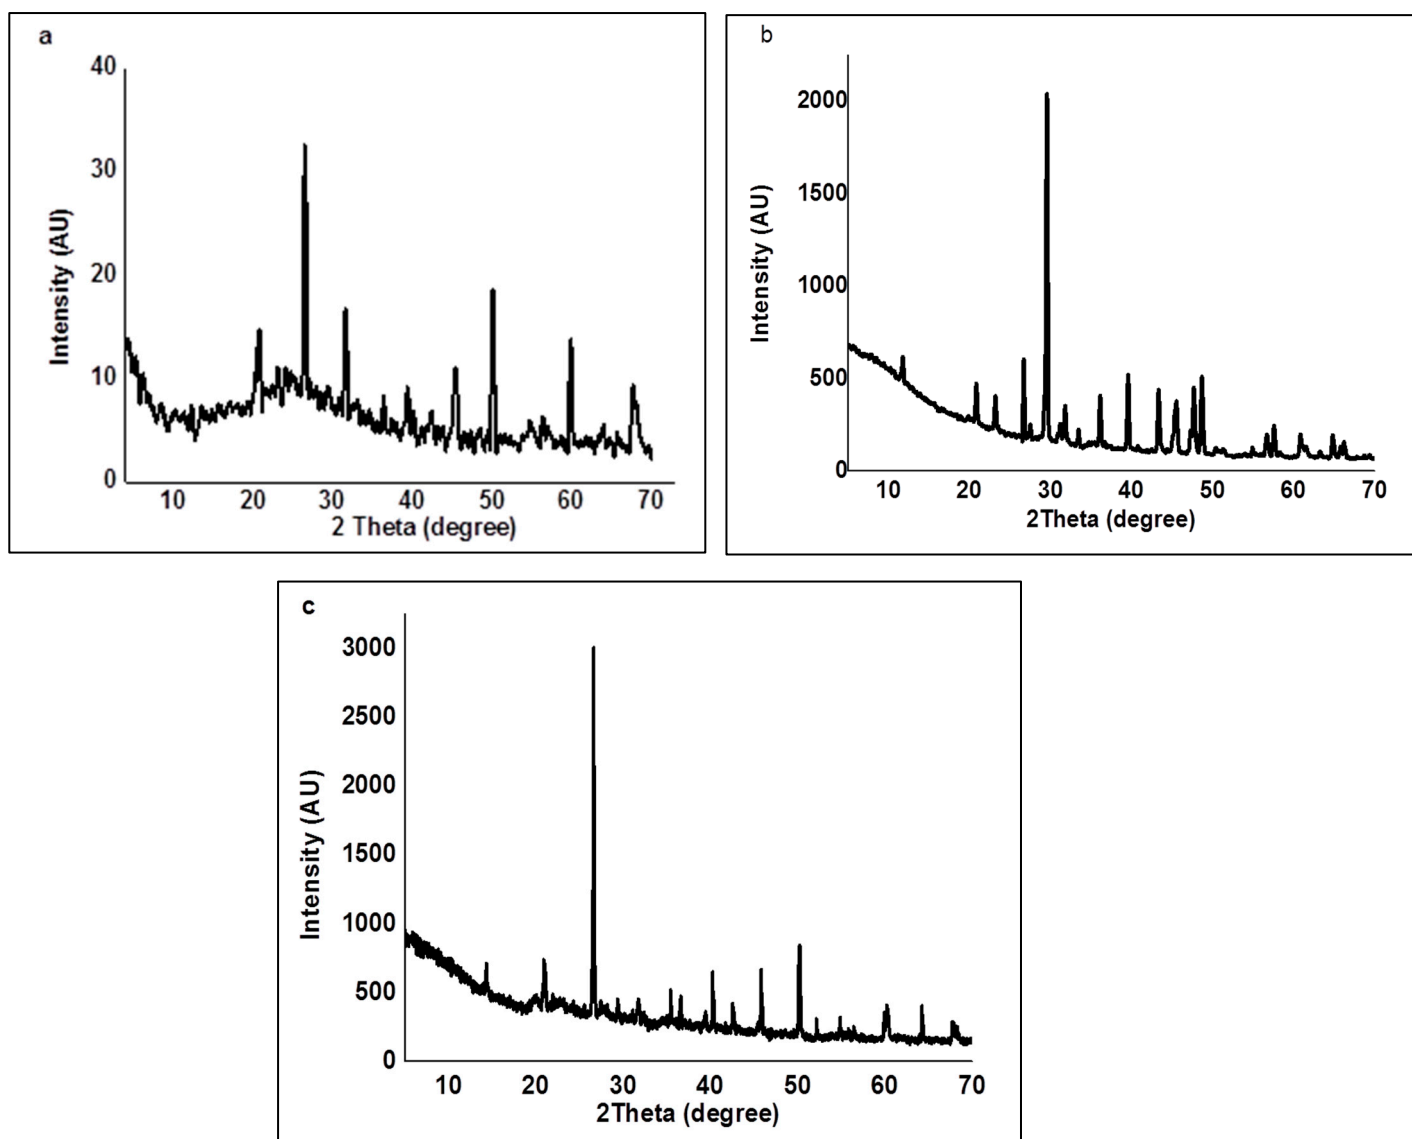

**Figure S2.** XRD patterns of the soil samples. a, b and c: XRD patterns of soil samples #4 , #5 and #6, respectively.

**Table S1.** Estimated chemical composition of the soil and wooden samples by X- ray diffraction technique.

| Sample | Compound Name | Chemical Formula                                       | Semi Quant % | Ref. code   | Peaks Pos.(2 Theta)° |         |         |
|--------|---------------|--------------------------------------------------------|--------------|-------------|----------------------|---------|---------|
| #1     | Quartz low    | SiO <sub>2</sub>                                       | 55.3         | 05-0490     | 26.63                | 20.84   | 50.12   |
|        | Weddellite    | Ca<br>C <sub>2</sub> O <sub>4</sub> .2H <sub>2</sub> O | 27.9         | 17-0541     | 14.33                | 32.22   | 20.09   |
|        | Halite        | NaCl                                                   | 16.8         | 05-0628     | 31.72                | 45.46   | 56.48   |
| #2     | Halite        | NaCl                                                   | 100          | 05-0628     | 31.72                | 45.46   | 56.48   |
| #4     | Halite        | NaCl                                                   | 28.5         | 05-0628     | 31.72                | 45.46   | 56.48   |
|        | Quartz low    | SiO <sub>2</sub>                                       | 34.9         | 05-0490     | 26.63                | 20.84   | 50.12   |
|        | Kaolinite     | Al <sub>2</sub> Si <sub>2</sub> O <sub>5</sub>         | 36.6         | 14-0164     | 12.20                | 20.46   | 24.94   |
| #5     | Calcite       | CaCO <sub>3</sub>                                      | 82.4         | 05-0586     | 29.44                | 48.58   | 47.58   |
|        | Gypsum        | CaSo <sub>4</sub> .2H <sub>2</sub> O                   | 10.5         | 06-0047     | 20.76                | 11.66   | 29.14   |
|        | Quartz low    | SiO <sub>2</sub>                                       | 3.9          | 05-0490     | 26.63                | 20.84   | 50.12   |
|        | Halite        | NaCl                                                   | 3.2          | 05-0628     | 31.72                | 45.46   | 56.48   |
| #6     | Silicon Oxide | Si O <sub>2</sub>                                      | 54           | 00-046-1045 | 266.374              | 209.122 | 50.12   |
|        | Periclase     | MgO                                                    | 15           | 96-900-6754 | 31.734               | 458.395 | 425.876 |
|        | Calcite       | CaCO <sub>3</sub>                                      | 9            | 00-005-0586 | 29.44                | 48.58   | 47.58   |
|        | Halite        | NaCl                                                   | 12           |             | 31.72                | 45.46   | 56.48   |

96-900-  
8679

---
